# Supplementary material for: Ligand stimulation of CD95 induces activation of Plk3 followed by phosphorylation of caspase-8
Source: PubMed Central journal article supplement — Cell Res. 2016 Jun 21;26(8):914–34. doi: 10.1038/cr.2016.78 (PMC4973331; doi:10.1038/cr.2016.78), 2016-06-21
Supplement: cr201678x3.pdf [file cr201678x3.pdf]

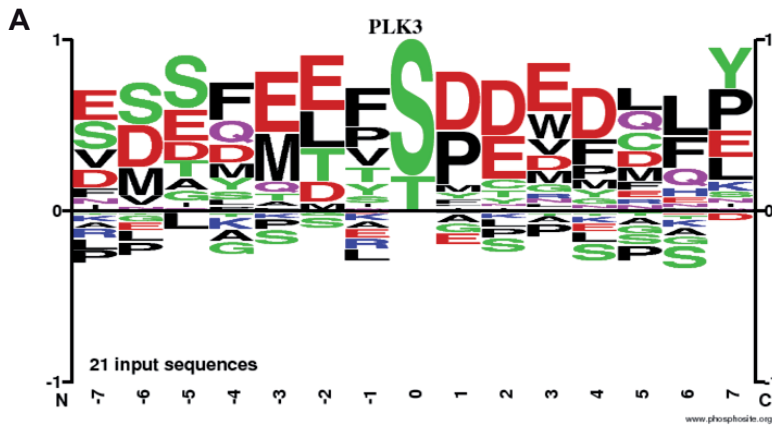

**B**

| Position            | -4 | -3  | -2 | -1  | 0   | +1  | +2  | +3  | +4  |
|---------------------|----|-----|----|-----|-----|-----|-----|-----|-----|
| www.phosphosite.org | F  | E   | E  | F   | S   | D   | D   | E   | D   |
| Salviet al, 2012    | E  | E/D | X  | E/D | S/T | E/D | E/D | E/D | E/D |

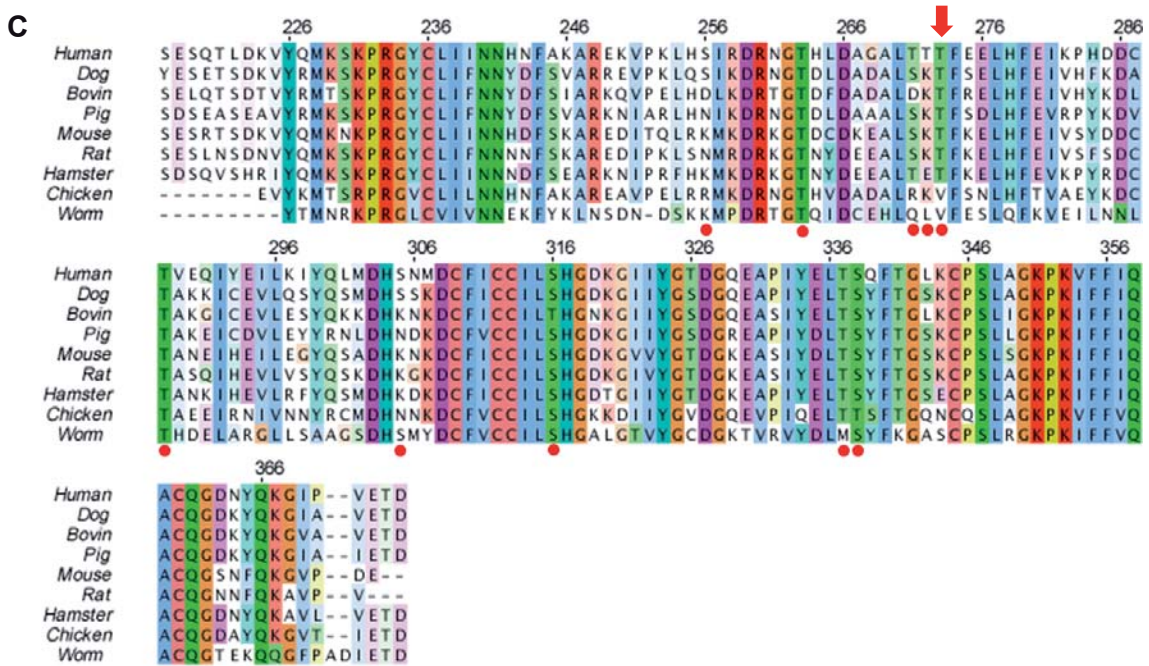

**D**

| position             | T273                              |
|----------------------|-----------------------------------|
| TOP loc p-value      | 0.76 (CellCycleAllphases)         |
| surrounding sequence | DAGALTTTFEELHFE                   |
| matching motifs      | CK2 (S/T-X-X-E), NEK6 (L-X-X-S/T) |

**Supplementary Information, Figure S3. The Plk3 consensus site and phylogenetic alignment of caspase-8-p18.**

(A) Schematic representation of the consensus site for Plk3 phosphorylation based on the analysis of 21 input sequences in Plk3 substrates ([www.phosphosite.org](http://www.phosphosite.org)). (B) Schematic representation of the substrate consensus sequences of Plk3 based on [www.phosphosite.org](http://www.phosphosite.org) and an analysis of peptide libraries for the identification of Plk3 phosphorylation sites. (C) Phylogenetic alignment of caspase-8-p18 using ClustalW2 among different species (Jalview representation). The conserved threonines/serines that exhibit additional acidic surrounding residues are highlighted by red points. T273 is highlighted by a red arrow. (D) Analysis of caspase-8 phosphorylation shown in PHOSIDA, a posttranslational modification database obtained from a high-resolution MS analysis.
